# Supplementary material for: Suppression of intestinal tumorigenesis in Apc mutant mice upon Musashi-1 deletion
Source: Oxford University Press journal article supplement (doi:10.1242/jcs.197574), 2017-01-13
Supplement: jcs197574supp.pdf [file jcs197574supp.pdf]

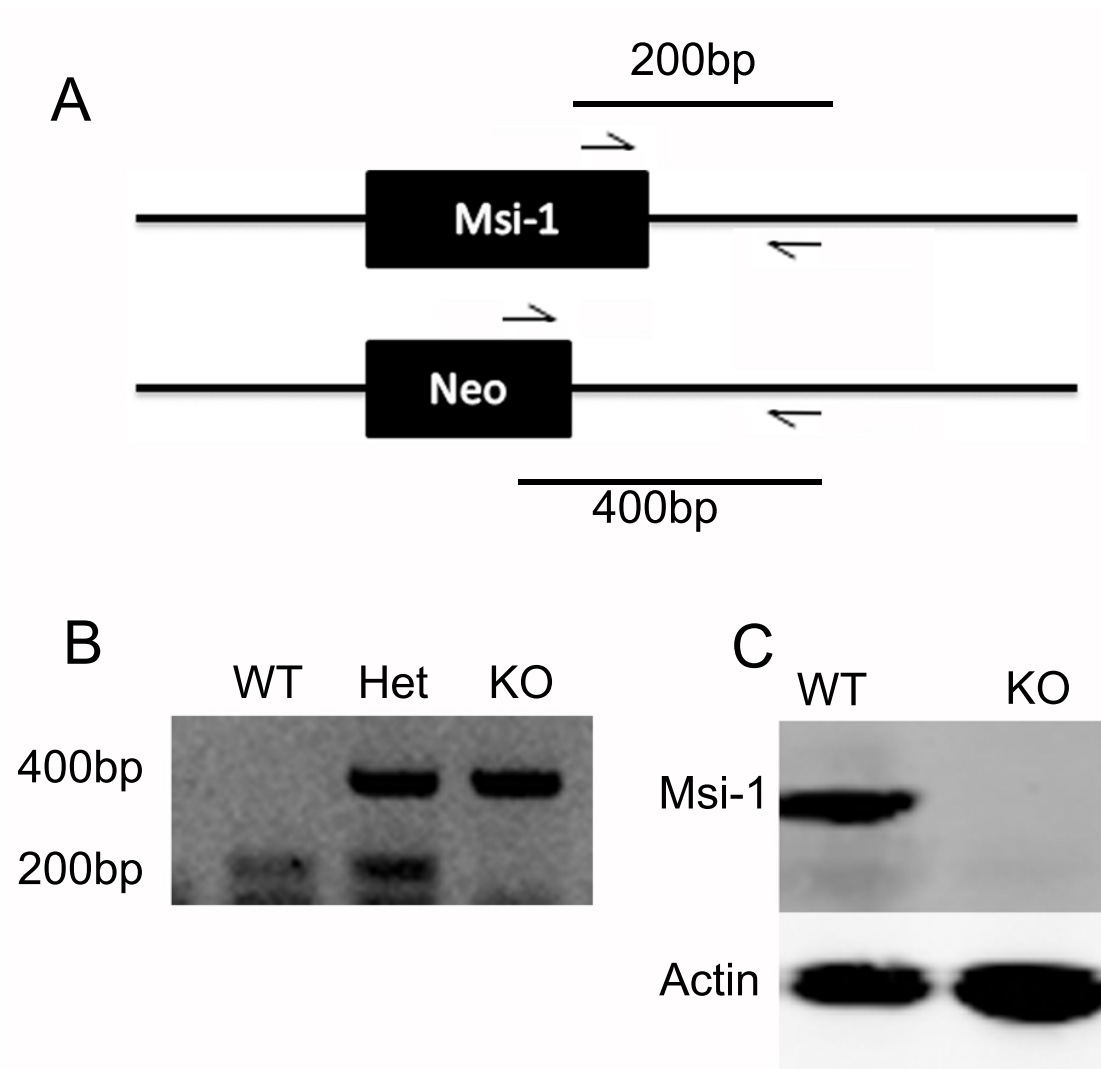

Fig. S1 **Validation of Msi-1 knock out mice.** (A) *Msi-1*<sup>-/-</sup> mice have a Neo<sup>R</sup> cassette replacing the *Msi-1* gene. Primers were designed with a common reverse primer downstream of the gene and forward primers within either the *Msi-1* gene or the Neo cassette. (B) Representative image of PCR *Msi-1* genotyping results, WT=wild-type, Het=*Msi-1* heterozygous, KO=*Msi-1* knockout. (C) Immuno-blot of intestinal whole cell protein lysates probed for Msi-1 and actin (loading control).

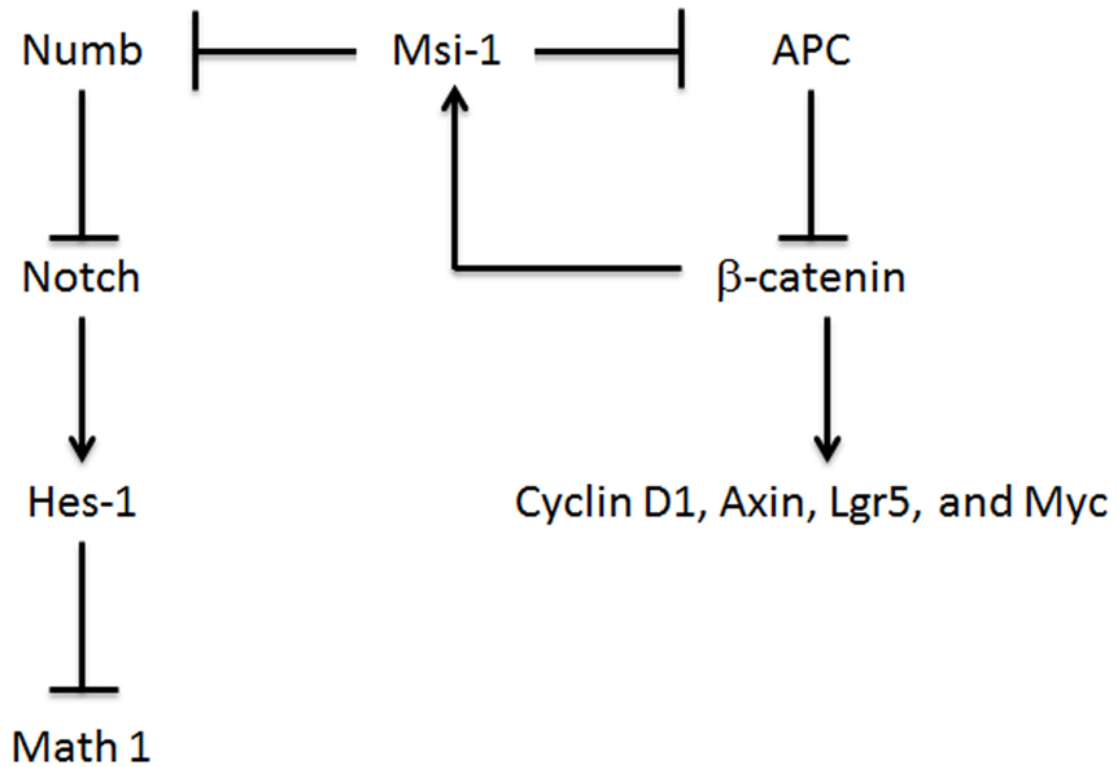

Fig. S2 **Msi-1 signaling networks interrogated in this study.** A simplified diagram of the Notch and Wnt Signaling pathways downstream of Msi-1 including the double negative feedback loop with APC.
